# Supplementary material
Source: PubMed Central journal article supplement (PMC5176357)
Supplement: NIHMS835194-supplement-Supplemental_material.pdf [file NIHMS835194-supplement-Supplemental_material.pdf]

## **Supplementary Figures**

### **Senescence from glioma stem cell differentiation promotes tumor growth**

Rie Ouchi, Sachiko Okabe, Toshiro Migita, Ichiro Nakano &  
Hiroyuki Seimiya

with serum

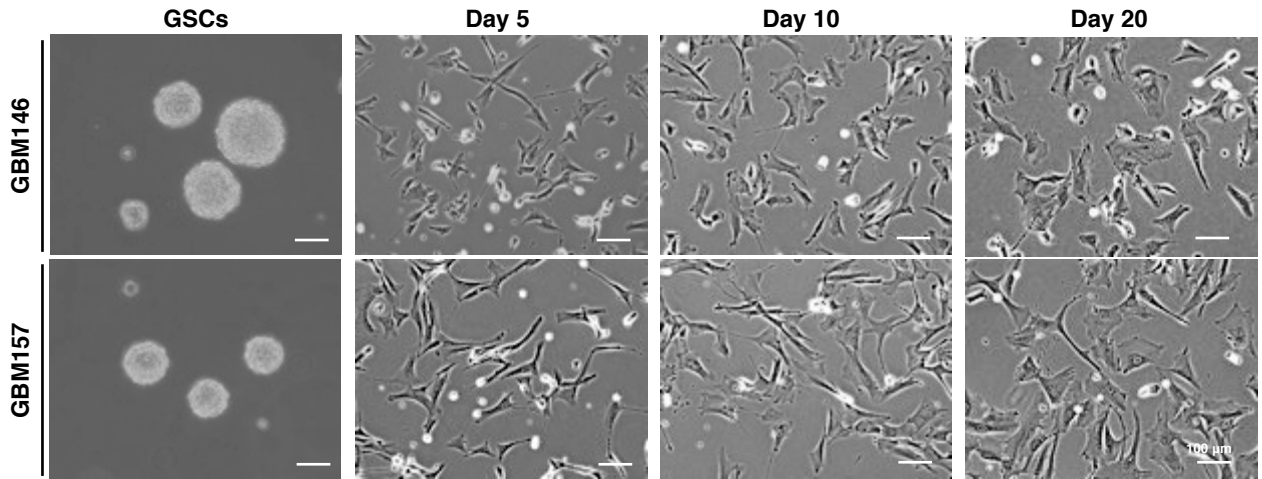

**Supplementary Figure S1. GSCs are adherent and sharp in serum-containing medium.** Morphological change of glioma stem cells (GSCs) at the indicated time after serum exposure. Cells were cultured in sphere medium (GSCs) or in serum-containing medium.

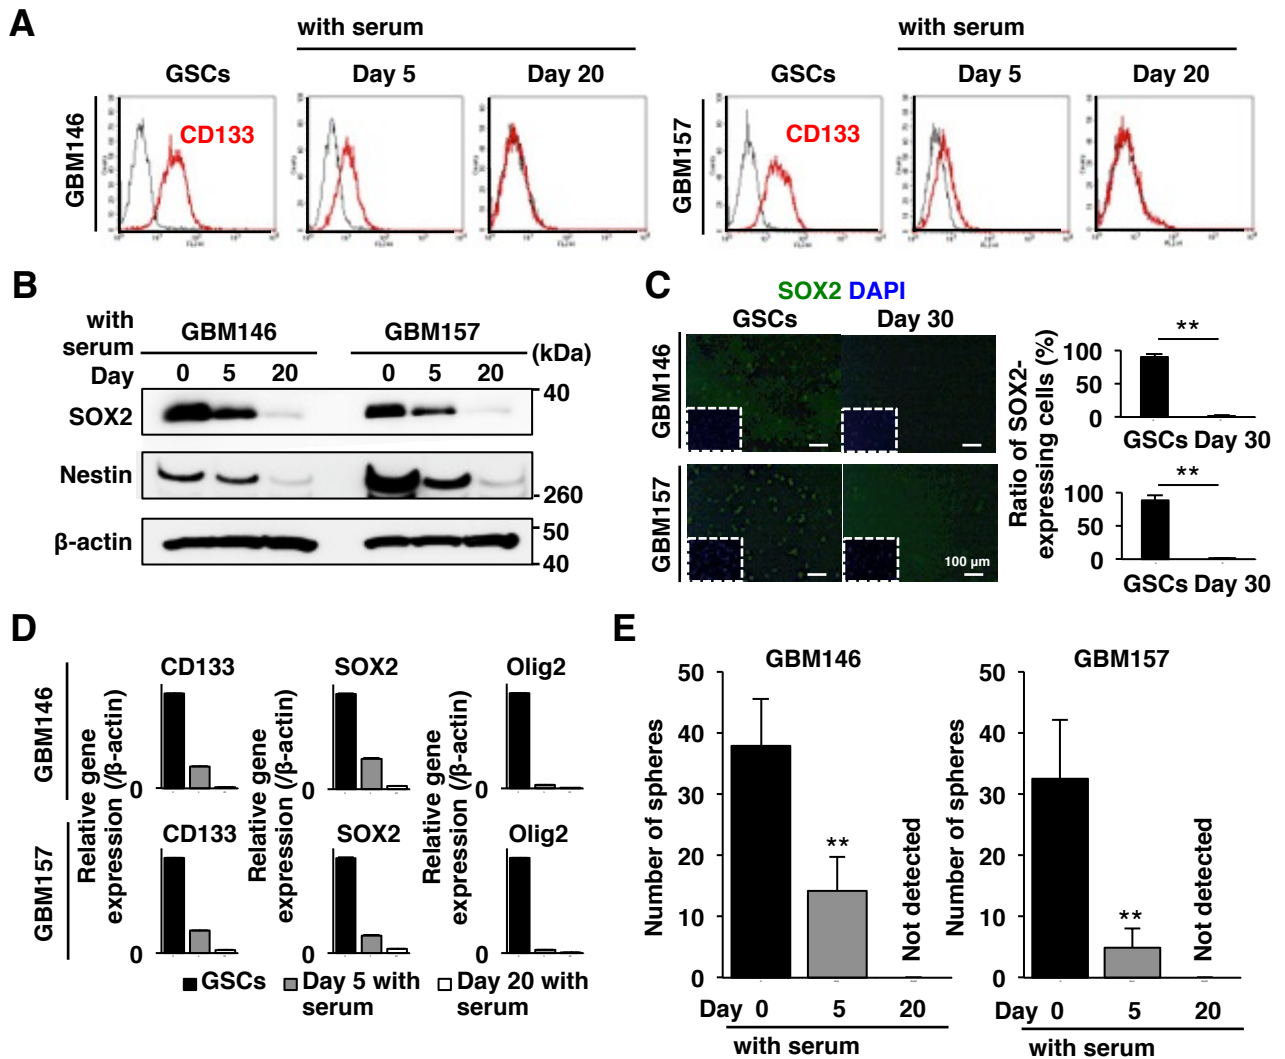

**Supplementary Figure S2. Differentiation of GSCs to NSGCs upon serum stimulation.** (A) Flow cytometry of CD133-positive cells. *Grey*: normal immunoglobulin as negative control. (B) Western blot analysis of SOX2 and Nestin.  $\beta$ -actin was used as an internal control. (C) Immunofluorescence staining with anti-SOX2 antibody (green). DNA was counterstained with DAPI (blue). Right graphs indicate quantitation of the SOX2-expressing cells ( $n > 90$ ). Error bars, standard deviations. Statistical evaluations were performed using the Welch  $t$  test. \*\*,  $P < 0.01$ . (D) Quantitation of *CD133*, *SOX2* and *Olig2* transcripts by RT-qPCR. The expression value for each gene was normalized with that of  $\beta$ -actin. (E) Sphere-forming assay. Cells were cultured in serum-containing medium for 5 or 20 days, and subsequently transferred into serum-free, sphere culture medium. The number of spheres was counted at day 7 of culture. Error bar, standard deviation. Statistical evaluations were performed using the Welch  $t$  test. \*\*,  $P < 0.001$ .

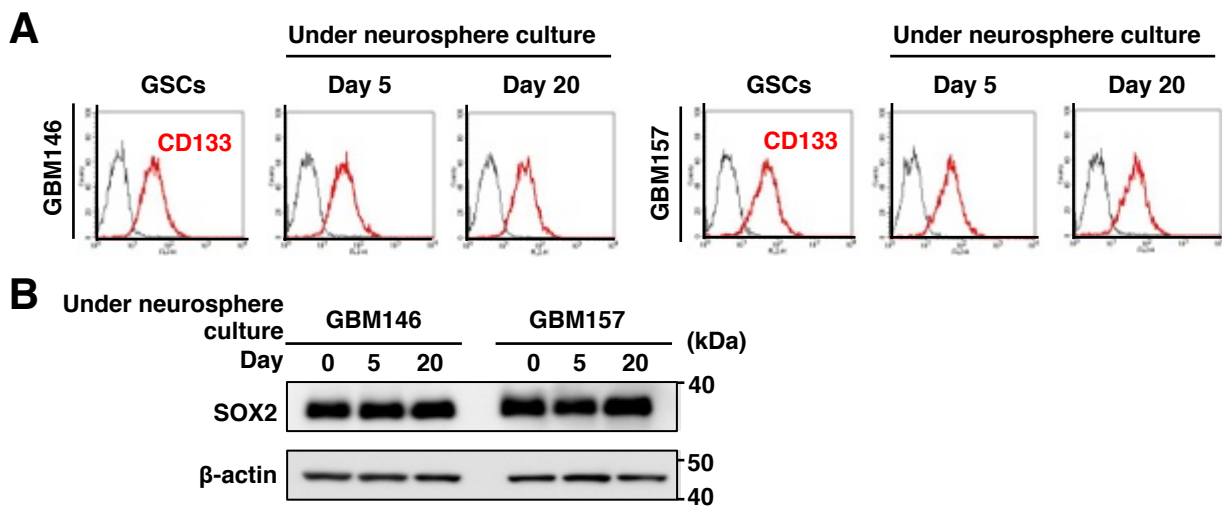

**Supplementary Figure S3. Stable expression of GSC markers under neurosphere culture.** GBM146 and GBM157 GSCs were cultured for 0, 5, or 20 days in neurosphere culture. (A) Flow cytometry with anti-CD133 antibody (red). Grey: normal immunoglobulin as negative control. (B) Western blot analysis of SOX2.  $\beta$ -actin was used as an internal control.

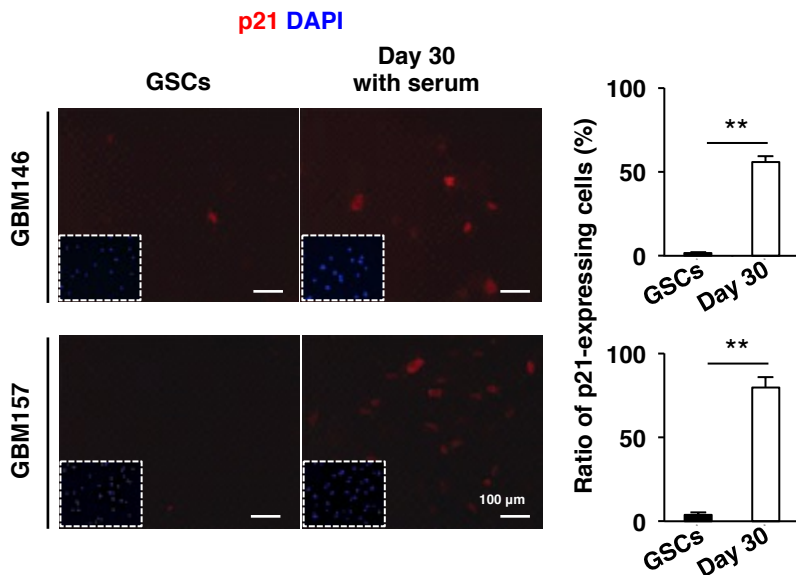

**Supplementary Figure S4. p21 upregulation in serum-treated glioma stem cells.** Glioma stem cells (GSCs) and non-stem glioma cells (NSGCs) cultured in serum-containing medium for 0 and 30 days, respectively, were subjected to immunofluorescence staining with anti-p21 antibody (red). DNA was counterstained with DAPI (grey). Graphs on right indicate quantitation of the p21-expressing cells ( $n > 90$ ). Error bars, standard deviations. Statistical evaluations were performed using the Welch  $t$  test. \*\*,  $P < 0.01$ .

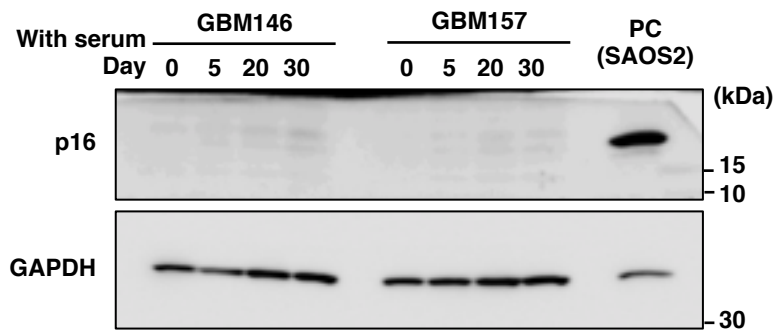

**Supplementary Figure S5. Lack of p16 induction during senescence of NSGCs.** Cells were cultured in serum-containing medium for the indicated time periods. Cell lysates were prepared and subjected to western blot analysis with anti-p16 and anti-GAPDH antibodies. PC: SAOS2 cells as positive control for p16 expression.

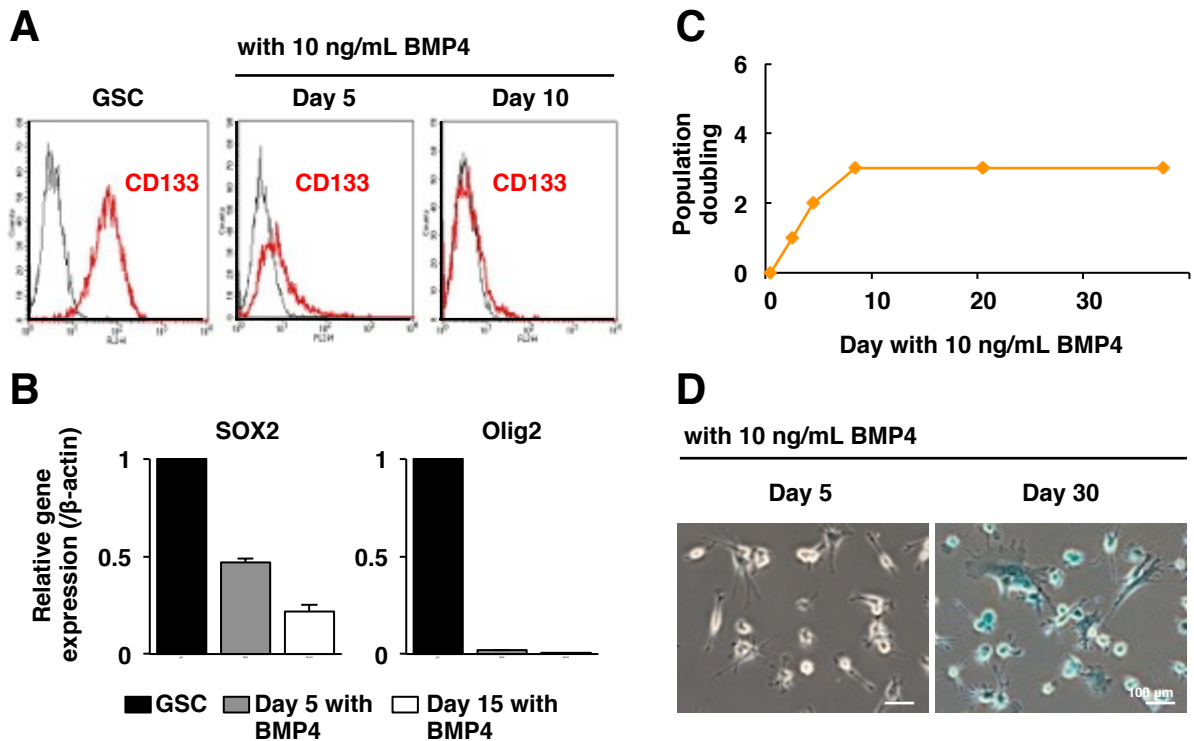

**Supplementary Figure S6. BMP4 induces differentiation and subsequent senescence of GSCs.** GBM157 GSCs were cultured in BMP4-containing (10 ng/mL), serum-free medium for the indicated time periods. Then, the cells were subjected to the following experiments: (A) Flow cytometry with anti-CD133 antibody (red). Grey: normal immunoglobulin as negative control. (B) RNA expression of *SOX2* and *Olig2* measured by RT-qPCR. The expression value for each gene was normalised with that of  $\beta$ -actin. (C) A growth curve of NSGCs in BMP4-containing culture. (D) Senescence-associated  $\beta$ -galactosidase (SA- $\beta$ -gal) staining. Blue color indicates senescence.
